# Supplementary material for: Molecular cloning of the tomato Hairless gene implicates actin dynamics in trichome-mediated defense and mechanical properties of stem tissue
Source: PubMed Central journal article supplement (PMC5049383; doi:10.1093/jxb/erw292), 2016-07-31
Supplement: supp_erw292_supplementary_figures_S1_S5.pdf [file supp_erw292_supplementary_figures_S1_S5.pdf]

## Supplementary Figures

### **Molecular cloning of the tomato *Hairless* gene implicates actin dynamics in trichome-mediated defense and mechanical properties of stem tissue**

Jin-Ho Kang, Marcelo L Campos, Starla Zemelis-Durfee, Jameel M. Al-Haddad, A. Daniel Jones, Frank W. Telewski, Federica Brandizzi, and Gregg A. Howe



```

AtSRA1      GLLDIVLVSPVDTKRFMQTAPWLGLIPGAEGQIVNAQD-GESPLVNLLKSATSASVSSPG
SlSRA1      GLLDIVL-REVDTRQFMQTAPWLGLIPGADGQILHSQEGGDSMPVTLFKSATATMSNP
*****      ***_*****:***::*: *:*:*.*:*:*:*:*:*:*:*:*:*
AtSRA1      CLNPAAFYMSKQAEAADLLYKANMNGGSVLEYTLAFTSASLDKYCSKWSAPPKTGFVDI
SlSRA1      CTNPTSFHTISRQAEAADLLYKANINTGSVLEYALAFSAALDKYCSKWSAAPPKTGFIDI
* **::*:*:*.******:* *****:*****:*****.******:*
AtSRA1      TTSKDFYRIYGGLQIGYLEEITAPQSAQHEVLGDSIAWGGCTIIYLLGQQLHFELDFDSY
SlSRA1      TTSKDFYRIFSGLQIEYLEESIQLQSNQYEMLGDSVAWGGCTIIYLLGQQLHFELDFDSH
*****:.*** ** ** * *:*:*:*:*:*:*:*:*:*:*:*:*:*:*:*:*
AtSRA1      QVLNVSEVETVSASHTHRNPQIHQGWEGGLEGMKKARRLNNHVFSMLKARCPLDKTACA
SlSRA1      QVLNVAEVESVAISPTQKNPNFLQIEGLEAMKKARRLNNHVFSMLKARCPLDKQACA
*****:***:*:* * *:*.***::* * *****.****** **
AtSRA1      IKQSGAPLPRVRFENTVSAFETLPQKGTVG
SlSRA1      IKQSGAPLHRIKFENTVSAFETLPQKGA--
***** *:*.******:

```

**Supplementary Fig. S1.** Amino acid sequence comparison of Arabidopsis and tomato SRA1. Shown is a sequence alignment of Arabidopsis (*AtSRA1*) and tomato (*SlSRA1*) SRA1 proteins, which share 81% amino acid sequence identity.

(A) WT DNA

GTTGAACCTAGAATCTGTGTGCTTTGATATCTTTGTGAAAATATCAGAGCATACAACCTCTAAGCCTAAGAGGATTGATATAATAGCCAAGGCTCTT  
TATAAACCCCTATGGAAGTTCTACACAACCTCATATGAAACCCTATATAACTCAACAGTTCAGGACCTTAGCTGTTATCTGGATATATTTTAA  
GCAATCACTATAGGAAGTTGGTAAACCTAGCACATGAGATTAAGCAGAATCAAAAATCTTTGGAAAGATATCATGTGTTTGTAAAGGGCTAC  
AGTTATGCTCCTGAAAGCTGTTTTATGTAAAGATCTATAAAACAACAATGACAACAATGCTTTAATCCTGAACTAATAGTGGCCCTGGGCTTCTG  
CTCTTCAATGTAAGAGGTGGCCAGCCATTTGTCAAGGCCAGGAATCCGGTGGACATCTCAGCGGAGGGATCTAGGCATATGAATCTTTTATG  
TGTTCCACTCTATTTGCCGATTTCATCCAATGCTTAATAATGTGTCTTTAAGATAAAATGGGGGGTTTCTAACTTGGTACTTCTTTAGACC  
TCACATATGTAATCTGTAAACCAACTAAAAAGACTACCAACAAGTACCAGATCTTAGTCCCGGCTAATTCATATTTGCTTACTTCGACAAC  
ATGGACATTTACATCCTCTCAGTCTTACTCTCGGTTTGATAAGTAGAATTATCATATATTTGACATCCAACATTACTTTCTATCTTCAGAGT  
ATTGAAGCTTTGCTAGAAGCTATGAAGAAAGCAAGGAGGCTAAATAATCATGTGTTTCAATGTTAAAAGCACGCTGTCCATTGGAAGATAAAC  
AGGGCTTGTGCCATCAAAACAAGCGGTGCACCTTTGCATCGGATAAAAATTTGAGAACTACTGTGTCCGCTTTTGAACCGTTGCCACAGAAAGGTGC  
CTGAGCCCTGCTTCCATTTTCATGTCAGAAGTTGTCATGTACGAACCTTCTTATCATGTATGTAATATATGTTTATCGATGACTCGTTGCTC  
TGAGATTGAAGATGATGCTACCTGTTTCAAGTATAGATATAGAGATTGTAAGATGAAGTAAAACAAGTTCATTGGAATAGATGTTGAGGC  
AGCAGAAATAGAATGAACATCTAATGGAGAGGTAATAGAGTACCCATAGATTTTTTCATGAAAAGTATCTTTGAGTACATGTCAGTCTTTTCTT  
TTCTTTTCTATCAGATAAAACCTAATCATTAGGGTAAAACAGCTTTTGTGATTGACAAATCTAACTGGCTAAAAGCTGTAGTGTACTAAC  
ACAATAGCTTTTATCCATGATTGAAGGAACATTTTTTCAACTGTTTTCGACTCACTTTTGGTTCGACTCACTTTTGGTTCGAACTTTGTCAC  
GAACTACAACCTATACCCTACCTGCGTCTCATTTTATATATAACATTTCCGATCTCAAAAAGTCGAACAAGTTTAAATTTTTTCATGGATTGTAT  
AGCATTTTTAAATATTAATATTTGTGATTTCATGTTCTCGCTGTTTTTCAAAAGAAATGAAGTGGTTGACTTGGCACGGAGTGAAAGAGTATAA  
AGAAATTTTGAATCTCGTGGTCTAAATTAAGTTAGATCAAAATGTACAAAATTTGATCTTTGATCTTGTGATCTTAAATATGCCACGTGAAAA  
GTTGTACCGGATGATGATCAACTTTTTACGTAATTTACAAATACATAAAAATTTCTATTTAAAAAAATTTGAGGATTTGCTGAACTTTGCTC  
AAACATAAACCTTTGATTTCTCAAAATATAAAAGATGACATATAAAATTTGTGATGAAATGAGTATAGTTTAAATCGATTTTGTTTTACAAAAATTT  
TAGTGAGGAAATTCACCTAAATAATTTTTCAACCTGATTTAACTTAATTAGCAGCCAAAAAAGAGTATCTGTCTCCCTAGTGATATACA  
TACATACAAACATATAAACTAATTAATAGATCCACCAAGCTTCTGTATACCAATTTCAATAACATTTCACTTAAATAATTTGTGTA  
AGAGTAGCCTAATGATCAACTGTGACATTAATGTTTTTTTTTAAATAAAGAGTACAATAAAATGTGAGACACATTAATGTTGTTTGTTCAG  
AAAGTTATTACATTTACCTAACCTTTATATTTGGCCCTTTTTTTTCTCTATAATAAAATGAATACATCTACACCCTCAAAAGAAATTTAATA  
CAAAATAATATCCAGCTACAACCTTAAATTTGTTTGTGATCATTTACAACCTTTTTTTTTTCAAAATTTGGCAATTTCACTTTTAAAGGAAATTTGATT  
TCTACACTTTGTAAGTTAGGTTTGAATGTCCTAATGTATTGAACCTATTTTAAACACTCAAGATTAATCCTATAATCCTTCTTTATGAACCTTT  
AGCATAGCATTTTTATTCCCTAGATAAAGAAGACTTCTGTTGTGAAATTAGAAAAATACATCAACTACCAACATTTATTAATGTCACCACTACAAA  
AGATGAAAAACACCTATTCACATTAATTTGTTAAAGATATTGGTCTTTGCTAAATGGGGGACCAATTTTTATACATGATATAATGATTAGCTCT  
TAAGGAAACATGTCAAACAAAAAGGGTGTGTTTAAATGGTAGGAAAGAAAAATGTGTGCTACTAATATATTTATGAAAAATTAGTGATTTTTTA  
ATTTATATTTGTGTTTGGTAGGTAAGAAAAAATATATTTCCAAAAGTATGAATGAATGCATGAATGGTCTGTTAATTTACAGCAACTAGT  
GATCAAAGTCACCTCACTAGTGCAGGAGCTTTGAAAGATGATCGTGAATACAATAAATTTAGGAGGAAAAAACAAGAACTTTTATATACATA  
AAAACATATTTTAGATATTAAGATCAATATTTAGATTTATTTGGACCTGTCCCACTTAAAATGAATGACTATAAGTTTACTGGTCAATTTAT  
TATACATTAACCTGACCACCTAGACATTTGCAATATTTATATAATCTAGAAAAACACCATAAGGTGGATGATGGTAAGGTGTTGGGTGAAAGAG  
GGGTAAATTTACAATAATATCATGATTCGAGTCTACATCATGGACATAATCGGTATTTAAAAATTTATTTGATCAGAGCAAACTAACATACCTTA  
AAGACTGAATAATGACTAGTGCAGGAGCTTTGAAAGATGATCGTGAATACAATAAATTTAGAGAGAAAAAACAAGAACTTTTATATACATA  
AAAGTCTGAAATATGTATAATATGTATATGCTTAGAAAAATAACTATGATCATAACTCAACTGGCTCGTCTATGAAGTCCCTAACATACTTTAA  
AAAATATTATTAGGCAAGACCCCTGGCTACCTGAACTTTACTAATAACATAAAATAAATTACTAATACTCAAGATAAATTAGAGCCCTTCAAAG  
TAAGGAGGTCTCATATATTTGGTTAAACATGATCCTAATGATGTGATGTGCTCCATCTGAAATATCCGAGTCTACATTATTAAGATGAAG  
CGTAGAATGACGTAAAGAAATAAATGTAGGGTATGTAATAAGTTGAAATGAACACTAGTTAAAATTTGAAGATTTGAGCTAAATGAATAGCTC  
TGAAGATAGACTGAAATAAAGTCAGCTGAGTAGTATGAAATATGATTTTTCAATTTAAAGGTTGGGAAATATT

(B) *hl* DNA

GTTGAACCTAGAATCTGTGTGCTTTGATATCTTTGTGAAAATATCAGAGCATACAACCTCTAAGCCTAAGAGGATTGATATAATAGCCAAGGCTCTT  
TATAAACCCCTATGGAAGTTCTACACAACCTCATATGAAACCCTATATAACTCAACAGTTCAGGACCTTAGCTGTTATCTGGATATATTTTAA  
GCAATCACTATAGGAAGTTGGTAAACCTAGCACATGAGATTAAGCAGAATCAAAAATCTTTGGAAAGATATCATGTGTTTGTAAAGGGCTAC  
AGTTATGCTCCTGAAAGCTGTTTTATGTAAAGATCTATAAAACAACAATGACAACAATGCTTTAATCCTGAACTAATAGTGGCCCTGGGCTTCTG  
CTCTTCAATGTAAGAGGTGGCCAGCCATTTGTCAAGGCCAGGAATCCGGTGGACATCTCAGCGGAGGGATCTAGGCATATGAATCTTTTATG  
TGTTCCACTCTATTTGCCGATTTCATCCAATGCTTAATAATGTGTCTTTAAGATAAAATGGGGGGTTTCTAACTTGGTACTTCTTTAGACC  
TCACATATGTAATCTGTAAACCAACTAAAAAGACTACCAACAAGTACCAGATCTTAGTCCCGGCTAATTCATATTTGCTTACTTCGACAAC  
ATGGACATTTACATCCTCTCAGTCTTACTCTCGGTTTGATAAGTAGAATTATCATATATTTGACATCCAACATTACTTTCTATCTTCAGAGT  
ATTGAAGCTTTGCTAGAAGCTATGAAGAAAGCAAGGAGGCTAAATAATCATGTGTTTCAATGTTAAAAGCACGCTGTCCATTGGAAGATAAAC  
AGGGCTTGTGCCATCAAAACAAGCGGTGCACCTTTGCATCGGATAAAAATTTGAGAACTACTGTGTCCGCTTTTGAACCGTTGCCACAGAAAGGTGC  
CTGAGCCCTGCTTCCATTTTCATGTCAGAAGTTGTCATGTACGAACCTTCTTATCATGTATGTAATATATGTTTATCGATGACTCGTTGCTC  
TAATTTATTTGTGATTTCATGTTCTCGCTGTTTTTCGATGTACTCGTGTGCTCTGAGATTGAAGATGATGCTACCTGTTTCAAGTATGAGAAATA  
AATTTACTAATACTCAAGATAAATTTAGAGCCCTTCAAAGTAAAGGAGGTCTCATCATATTTGGTTAAACATGATCCAAATGATGTGTATGTCGTC  
CATCTGAAATATCCGAGTCTACATTTATAAAGATGAAGCGTAGAATGACGTAAGAAATAAATTTAGGGTATGTAATAAGTTGAAATGAAACA  
CTAGTTAAAATTTGAAGATTTCTGAGCTAAATGAATAGCTCTGAAGATAGACTGAAATAAAGTCAGCTGAGTAGTATGAAATATGATTTTCAATTT  
AAAGGTTGGGAAATATT

Supplementary Fig. S2. Genomic sequence of the affected region in WT and *hl* plants.

(A) Sequence of WT *SR1* genomic DNA. The red highlighted sequence denotes the last exon of the gene. Sequences that are present or absent (3187 bp) in *hl* are indicated by the black and gray letters, respectively. Sequences that are present but rearranged in *hl* are underlined in red (56 bp), dark blue (66 bp), and green (46 bp). (B) Sequence of *SR1* genomic DNA in the *hl* mutant. WT sequences that are retained in *hl* are underlined in red (56 bp), dark blue (66 bp), and green (46 bp), and correspond to the underlined sequences in panel A. The orientation of sequences underlined in green is reversed in WT. In addition, two nucleotides (highlighted with red) appear to be inserted in *hl*.

WT MAVP IEEA IAAALSTFSLEDDQPEVQGPFWVSAEGGATISPIEYSDVAAYRSLSEDTKA  
h1 MAVP IEEA IAAALSTFSLEDDQPEVQGPFWVSAEGGATISPIEYSDVAAYRSLSEDTKA  
\*\*\*\*\*

WT INQLNTLIQEGKEMGSVLYTYRSCVKALPQLPDSMKQSQADLYLETYQVLDLEMSRLREI  
h1 INQLNTLIQEGKEMGSVLYTYRSCVKALPQLPDSMKQSQADLYLETYQVLDLEMSRLREI  
\*\*\*\*\*

WT QRWQASAASKLAADMQRFSRPERRINGPTVTHLWSMLKLLDVLIQLDHLKNAKASIPNDF  
h1 QRWQASAASKLAADMQRFSRPERRINGPTVTHLWSMLKLLDVLIQLDHLKNAKASIPNDF  
\*\*\*\*\*

WT SWYKRTFTQVSVQWQDTSMDREELDDLQIFLSTRWAILLNLHVEMFRVNNVEDILQVLIV  
h1 SWYKRTFTQVSVQWQDTSMDREELDDLQIFLSTRWAILLNLHVEMFRVNNVEDILQVLIV  
\*\*\*\*\*

WT FIVESLELNFALLFPERHTLLRVLPLVLAASSEKDESESLYKRVKINRLMNIKNDPVV  
h1 FIVESLELNFALLFPERHTLLRVLPLVLAASSEKDESESLYKRVKINRLMNIKNDPVV  
\*\*\*\*\*

WT PAFPDHLSPAAILKELSTYFPKFSQTRLLTLPAPHELPLREAQDYQRQYLIVNHIGAI  
h1 PAFPDHLSPAAILKELSTYFPKFSQTRLLTLPAPHELPLREAQDYQRQYLIVNHIGAI  
\*\*\*\*\*

WT RAEHDDFTVRFASAMSQVLVLLKSIDGVDVEWVKEVKGNTYDMVVEGFQLLSRWTARVWEQ  
h1 RAEHDDFTVRFASAMSQVLVLLKSIDGVDVEWVKEVKGNTYDMVVEGFQLLSRWTARVWEQ  
\*\*\*\*\*

WT CAWKFSRPCKDPVPMESHDMPASFSDEYKVVRYNYNAEERKALVELVSYIKSIGSMQKV  
h1 CAWKFSRPCKDPVPMESHDMPASFSDEYKVVRYNYNAEERKALVELVSYIKSIGSMQKV  
\*\*\*\*\*

WT DTSVTDALWETIHAEVQDFVQNTLATMLRRTTFRKKKDLSRILSDMRTLSADWMANASKPE  
h1 DTSVTDALWETIHAEVQDFVQNTLATMLRRTTFRKKKDLSRILSDMRTLSADWMANASKPE  
\*\*\*\*\*

WT TEMQSYPHSGEESRGTLYFPRPVAPTSAQVHCLQFLIYEVVSGGNMRKPGGIFGNSGSEI  
h1 TEMQSYPHSGEESRGTLYFPRPVAPTSAQVHCLQFLIYEVVSGGNMRKPGGIFGNSGSEI  
\*\*\*\*\*

WT PINDLKQLETFFYKLGFFLHVLDYATLGLTLDLGLFWREFYLESSRVIQFPIECSLPW  
h1 PINDLKQLETFFYKLGFFLHVLDYATLGLTLDLGLFWREFYLESSRVIQFPIECSLPW  
\*\*\*\*\*

WT MLVDHVIESPIIGLLESALMSFDIYNDAAQQALVILKQRFYDEIEAEVDNCFDIFVLKL  
h1 MLVDHVIESPIIGLLESALMSFDIYNDAAQQALVILKQRFYDEIEAEVDNCFDIFVLKL  
\*\*\*\*\*

WT CETIFTYYKSWAASELLDPSFLFAIDIGEKFVQPMRFVALLKTTRVKLLGRTINLRSLI  
h1 CETIFTYYKSWAASELLDPSFLFAIDIGEKFVQPMRFVALLKTTRVKLLGRTINLRSLI  
\*\*\*\*\*

WT ADRMNMFRDNLEFLFDRFESQDLCAIVELEMLLDILQLTHELLSKDLTIDSFNLMLNEM  
h1 ADRMNMFRDNLEFLFDRFESQDLCAIVELEMLLDILQLTHELLSKDLTIDSFNLMLNEM  
\*\*\*\*\*

WT QENVSLVSYSSRLASQIWTEMQNDFLNFILCNTTQRVRSARVPPVPVQKPSVPYAKPN  
h1 QENVSLVSYSSRLASQIWTEMQNDFLNFILCNTTQRVRSARVPPVPVQKPSVPYAKPN  
\*\*\*\*\*

WT FYCGTPDLNSAYQS FARLYCGFFGVP HMFSLVKLLGSRSLPWLIRALLDNISNKITTVEP  
h1 FYCGTPDLNSAYQS FARLYCGFFGVP HMFSLVKLLGSRSLPWLIRALLDNISNKITTVEP  
\*\*\*\*\*

```

WT      MITGLQEALPKSIGLLPFDGGISGCMRLAKEHLSCWHSKSELKAEVLCGIKEIGSILYWM
hl      MITGLQEALPKSIGLLPFDGGISGCMRLAKEHLSCWHSKSELKAEVLCGIKEIGSILYWM
*****

WT      GLLDIVLREVDTRQFMQTAPWLGLIPGADGQILHSQEGGDSPMVTLFKSATTATMSNPNC
hl      GLLDIVLREVDTRQFMQTAPWLGLIPGADGQILHSQEGGDSPMVTLFKSATTATMSNPNC
*****

WT      TNPTSFHTISRQAEAADLKYKANINTGSVLEYALAFSAALDKYCSKWSAAPKTGFIDIT
hl      TNPTSFHTISRQAEAADLKYKANINTGSVLEYALAFSAALDKYCSKWSAAPKTGFIDIT
*****

WT      TSKDFYRIFSGLQIEYLEESIQLQSNQTYEMLGDSVAWGGCTIIYLLGQQLHFELDFDSHQ
hl      TSKDFYRIFSGLQIEYLEESIQLQSNQTYEMLGDSVAWGGCTIIYLLGQQLHFELDFDSHQ
*****

WT      VLNVAEVESVAISPTQKNPNFLQIEGLEAMKKARLNNHVFMSLKARCPLEDKQACAI
hl      VLNVAEVESVAISPTQKNPNFLQV-----
*****

WT      KQSGAPLHRIKFENTVSAFETLPQKGA
hl      -----

```

**Supplementary Fig. S3.** Comparison of the predicted amino acid sequence of SRA1 in WT and *hl* plants. The *hl* mutant form of SRA1 is predicted to lack 63 amino acids at the C-terminus of the protein.

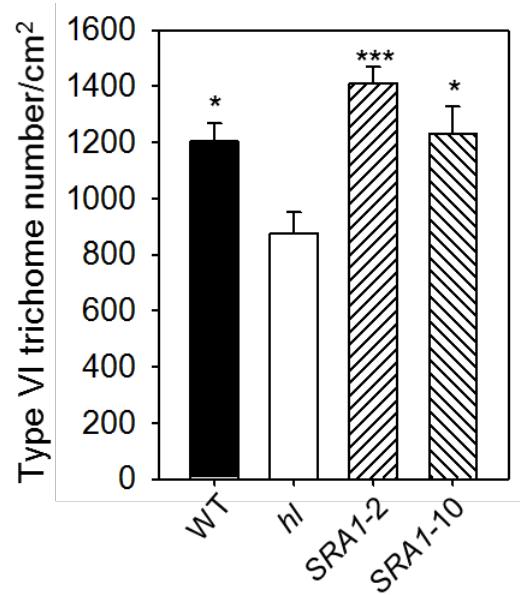

**Supplementary Fig. S4.** Density of type VI trichomes on leaves from WT, *hl*, and *SRA1*-complemented transgenic lines.

Light microscopy was used to determine the density of type VI trichomes on leaves of 4-week-old WT, *hl*, and complemented transgenic lines (*SRA1-2* and *SRA1-10*). Each data point represents the mean  $\pm$  SE of five independent plants per line. Asterisks represent significant differences between *hl* and other genotypes (unpaired *t* test: \*  $P < 0.05$ ; \*\*\*  $< 0.001$ ).

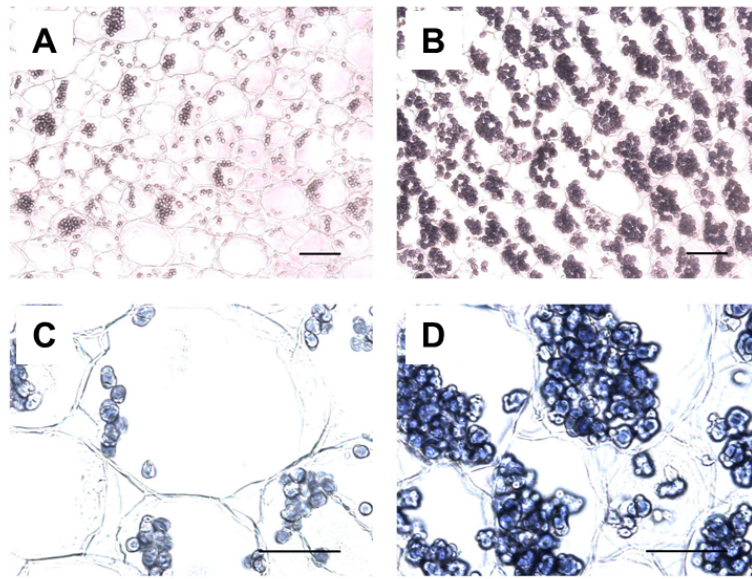

**Supplementary Fig. S5.** Iodine staining of pith cells from WT and *hl* stems.

WT (A) and *hl* (B) pith cells at low magnification (scale bar: 100  $\mu\text{m}$ ). WT (C) and *hl* (D) pith cells at high magnification (scale bar: 50  $\mu\text{m}$ ). Iodine-stained granules show characteristic purple-black color.
